# Supplementary material for: Cloud computing for detecting high-order genome-wide epistatic interaction via dynamic clustering
Source: PubMed Central journal article supplement (PMC4021249; doi:10.1186/1471-2105-15-102), 2014-04-10

SUPPLEMENTARY MATERIALS:

Figure S1: The workflow of the cloud implementation of DCHE on Windows Azure platform.

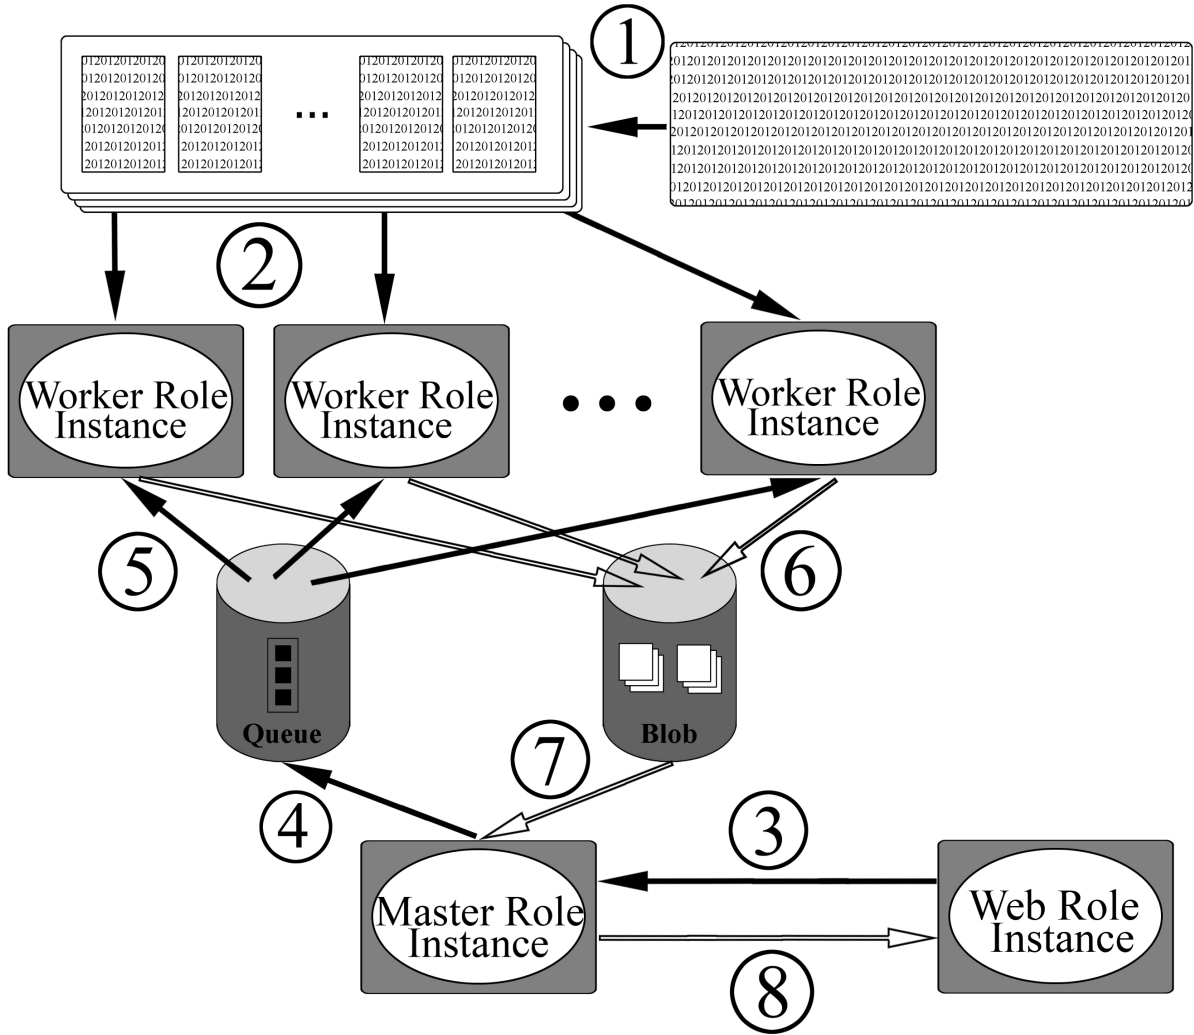

The explanation of steps is in the main text.

Figure S2: **Performance comparison on additive models with main effects.** For each model, we simulate data using sample size 800 and  $MAF \in \{0.1, 0.2, 0.4\}$ . The red, green, blue, cyan and magenta boxes show powers of DCHE, TEAM, SNPRuler, EDCF and BOOST, respectively.

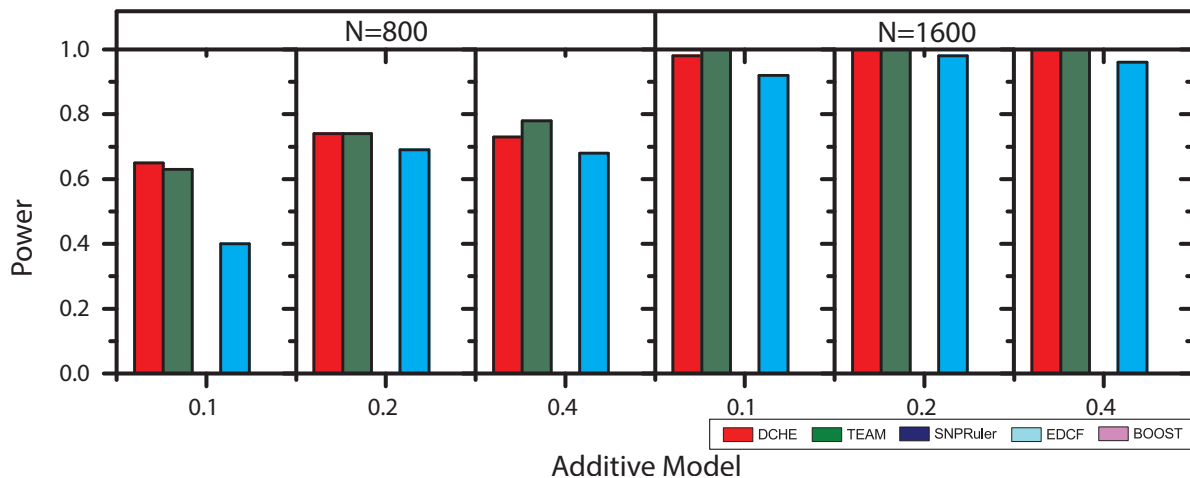

Table S1: Odds tables of epistasis models 1, 2, 3 and 4.

| Model 1 | BB       | Bb                     | bb                     |
|---------|----------|------------------------|------------------------|
| AA      | $\alpha$ | $\alpha$               | $\alpha$               |
| Aa      | $\alpha$ | $\alpha(1 + \theta)$   | $\alpha(1 + \theta)^2$ |
| aa      | $\alpha$ | $\alpha(1 + \theta)^2$ | $\alpha(1 + \theta)^4$ |

| Model 2 | BB                   | Bb                   | bb                   |
|---------|----------------------|----------------------|----------------------|
| AA      | $\alpha$             | $\alpha(1 + \theta)$ | $\alpha(1 + \theta)$ |
| Aa      | $\alpha(1 + \theta)$ | $\alpha$             | $\alpha$             |
| aa      | $\alpha(1 + \theta)$ | $\alpha$             | $\alpha$             |

| Model 3 | BB                   | Bb                   | bb                   |
|---------|----------------------|----------------------|----------------------|
| AA      | $\alpha$             | $\alpha$             | $\alpha(1 + \theta)$ |
| Aa      | $\alpha$             | $\alpha(1 + \theta)$ | $\alpha$             |
| aa      | $\alpha(1 + \theta)$ | $\alpha$             | $\alpha$             |

| Model 4 | BB                   | Bb                   | bb                   |
|---------|----------------------|----------------------|----------------------|
| AA      | $\alpha$             | $\alpha(1 + \theta)$ | $\alpha$             |
| Aa      | $\alpha(1 + \theta)$ | $\alpha$             | $\alpha(1 + \theta)$ |
| aa      | $\alpha$             | $\alpha(1 + \theta)$ | $\alpha$             |

The parameters  $\alpha$  and  $\theta$  control the prevalence  $p(D)$ , heritability  $h^2$  by given  $MAF$ .

Table S2: Odds table of epistasis model 5.

|    | BBCC     | BbCC                 | bbCC                 | BBCc                 | BbCc                      | bbCc                 | BBcc                 | Bbcc                 | bbcc     |
|----|----------|----------------------|----------------------|----------------------|---------------------------|----------------------|----------------------|----------------------|----------|
| AA | $\alpha$ | $\alpha$             | $\alpha$             | $\alpha$             | $\alpha$                  | $\alpha(1 + \theta)$ | $\alpha$             | $\alpha(1 + \theta)$ | $\alpha$ |
| Aa | $\alpha$ | $\alpha$             | $\alpha(1 + \theta)$ | $\alpha$             | $\alpha(1 + \beta\theta)$ | $\alpha$             | $\alpha(1 + \theta)$ | $\alpha$             | $\alpha$ |
| aa | $\alpha$ | $\alpha(1 + \theta)$ | $\alpha$             | $\alpha(1 + \theta)$ | $\alpha$                  | $\alpha$             | $\alpha$             | $\alpha$             | $\alpha$ |

The parameters  $\alpha$ ,  $\beta$  and  $\theta$  control the prevalence  $p(D)$ , heritability  $h^2$  and marginal effect size  $\lambda$  of disease loci (see definitions in the main text).

Table S3: Penetrance table of epistasis model 6.

|    | BBCC | BbCC | bbCC       | BBCc | BbCc      | bbCc | BBcc       | Bbcc | bbcc |
|----|------|------|------------|------|-----------|------|------------|------|------|
| AA | 0    | 0    | $16\theta$ | 0    | 0         | 0    | 0          | 0    | 0    |
| Aa | 0    | 0    | 0          | 0    | $4\theta$ | 0    | 0          | 0    | 0    |
| aa | 0    | 0    | 0          | 0    | 0         | 0    | $16\theta$ | 0    | 0    |

With minor allele frequency  $MAF = 0.5$ , model 6 with this penetrance table reaches the maximum  $h^2$  when penetrance  $p \in (0; 1/16]$ . There is no marginal effect of a single disease marker.

Table S4: Illustration of odds table of two-locus additive model.

|    | BB                    | Bb                    | bb                    |
|----|-----------------------|-----------------------|-----------------------|
| AA | $\alpha$              | $\alpha(1 + \beta)$   | $\alpha(1 + \beta)^2$ |
| Aa | $\alpha(1 + \beta)$   | $\alpha(1 + \beta)^2$ | $\alpha(1 + \beta)^3$ |
| aa | $\alpha(1 + \beta)^2$ | $\alpha(1 + \beta)^3$ | $\alpha(1 + \beta)^4$ |

The parameters  $\alpha$ ,  $\beta$  and  $\theta$  control the prevalence  $p(D)$ , heritability  $h^2$  and marginal effect size  $\lambda$  of disease loci (see definitions in the main text).

Table S5: Odds table of two-locus additive models.

|   | AABB   | AABb   | AAbb   | AaBB   | AaBb   | Aabb   | aaBB   | aaBb   | aabb   | MAF | $pD$ | $h^2$ |
|---|--------|--------|--------|--------|--------|--------|--------|--------|--------|-----|------|-------|
| 1 | 0.0743 | 0.1609 | 0.3486 | 0.1609 | 0.3486 | 0.7552 | 0.3486 | 0.7552 | 1.6359 | 0.1 | 0.1  | 0.03  |
| 2 | 0.0603 | 0.1133 | 0.2130 | 0.1133 | 0.2130 | 0.7526 | 0.2130 | 0.4004 | 0.4004 | 0.2 |      |       |
| 3 | 0.0396 | 0.0698 | 0.1232 | 0.0698 | 0.1232 | 0.2175 | 0.1232 | 0.2175 | 0.3837 | 0.4 |      |       |

Table S6: The contingency table of (rs1394608 and rs6847164). Here, the  $p - value_{unadjusted} = 6.78 \times 10^{-10}$ 

| Clusters | Cases | Controls | Total | Genotypes of rs1394608 and rs6847164 |
|----------|-------|----------|-------|--------------------------------------|
| 0        | 80    | 16       | 96    | 10, 11, 20, 22                       |
| 1        | 15    | 29       | 44    | 00, 21                               |
| 2        | 0     | 5        | 5     | 01, 02, 12                           |
| Total    | 95    | 46       | 141   |                                      |

Table S7: The contingency table of (rs10487833, rs10495593, rs1740752). Here, the  $p - value_{unadjusted} = 3.24 \times 10^{-18}$ 

| Clusters | Cases | Controls | Total | Genotypes of rs10487833, rs10495593 and rs1740752          |
|----------|-------|----------|-------|------------------------------------------------------------|
| 0        | 77    | 6        | 83    | 002, 010, 102, 111, 112, 122, 201, 211, 212, 220, 221, 222 |
| 1        | 12    | 15       | 27    | 001, 011, 101, 200, 210                                    |
| 2        | 0     | 25       | 25    | 000, 012, 100, 110, 120, 121, 202                          |
| Total    | 96    | 46       | 142   |                                                            |

Table S8: The contingency table of (rs9302001, rs10497231, rs380390, rs1940041). Here, the  $p - value_{unadjusted} = 8.28 \times 10^{-28}$ 

| Clusters | Cases | Controls | Total | Genotypes of rs9302001, rs10497231, rs380390 and rs1940041                                                             |
|----------|-------|----------|-------|------------------------------------------------------------------------------------------------------------------------|
| 0        | 77    | 0        | 77    | others                                                                                                                 |
| 1        | 0     | 44       | 44    | 0111, 0120, 0221, 1000, 1010, 1020, 1111, 1112, 1120, 1201, 1211, 1212, 1220, 1221, 2012, 2120, 2121, 2210, 2220, 2221 |
| 2        | 8     | 2        | 10    | 1100, 1200                                                                                                             |
| 3        | 3     | 1        | 4     | 2112                                                                                                                   |
| 4        | 6     | 1        | 7     | 2111                                                                                                                   |
| 5        | 2     | 2        | 4     | 2110                                                                                                                   |
| Total    | 96    | 50       | 146   |                                                                                                                        |

Table S9: Centre SNPs identified in top-1000 SNPs interactions on RA dataset.

| #SNPs per interaction | Centre SNPs from analyses of complete SNP set |                   |
|-----------------------|-----------------------------------------------|-------------------|
|                       | Centre SNPs (Genomic position)                | #Interacting SNPs |
| 2                     | <b>rs2395175 (Chr6: 32405026)</b>             | 880               |
|                       | <b>rs660895 (Chr6: 32577380)</b>              | 53                |
|                       | <b>rs6910071 (Chr6: 32282854)</b>             | 17                |
|                       | <b>rs2395163 (Chr6: 32387809)</b>             | 17                |
|                       | <b>rs3763309 (Chr6: 32375973)</b>             | 14                |
|                       | <b>rs3763312 (Chr6: 32376348)</b>             | 14                |
|                       | <b>rs7745656 (Chr6: 32680970)</b>             | 7                 |
|                       | <b>rs9275595 (Chr6: 32681355)</b>             | 7                 |
|                       | <b>rs9275374 (Chr6: 32668526)</b>             | 6                 |
|                       | <b>rs9275388 (Chr6: 32669084)</b>             | 6                 |
| 3                     | rs2395175 (Chr6: 32405026)                    | 866               |
|                       | rs660895 (Chr6: 32577380)                     | 134               |
|                       | rs9275595 (Chr6: 32681355)                    | 127               |
|                       | <b>rs9275439 (Chr6: 32671521)</b>             | 109               |
|                       | <b>rs9275427 (Chr6: 32670915)</b>             | 103               |
|                       | <b>rs9275418 (Chr6: 32670244)</b>             | 102               |
|                       | <b>rs9275425 (Chr6: 32670874)</b>             | 100               |
|                       | <b>rs9275555 (Chr6: 32677088)</b>             | 99                |
|                       | <b>rs9275428 (Chr6: 32670978)</b>             | 98                |
|                       | <b>rs9275393 (Chr6: 32669439)</b>             | 86                |
| 4                     | rs2395175 (Chr6: 32405026)                    | 999               |
|                       | rs9275595 (Chr6: 32681355)                    | 998               |
|                       | <b>rs888206 (Chr17: 53468213)</b>             | 100               |
|                       | <b>rs1359679 (Chr9: 121597614)</b>            | 99                |
|                       | <b>rs2817763 (Chr6: 110972494)</b>            | 42                |
|                       | <b>rs7227652 (Chr18: 46223842)</b>            | 41                |
|                       | <b>rs2025324 (Chr9: 7102389)</b>              | 39                |
|                       | <b>rs6577430 (Chr1: 7324468)</b>              | 37                |
|                       | <b>rs4238618 (Chr16: 12946129)</b>            | 34                |
|                       | <b>rs3802400 (Chr9: 7119141)</b>              | 29                |

Table S10: The disease association of DCHE selected genes from gene-only SNP analyses.

| #SNPs per interaction | # DCHE genes in top 1000 SNP pairs | Reported in HuGE Navigator database |             |
|-----------------------|------------------------------------|-------------------------------------|-------------|
|                       |                                    | #Analyzed genes                     | #DCHE genes |
| 2                     | 631                                |                                     | 77          |
| 3                     | 440                                | 793                                 | 40          |
| 4                     | 719                                |                                     | 59          |

Table S11: Centre genes identified in top-1000 SNPs interactions on RA dataset.

| #SNPs per interaction | Centre genes from gene-only SNP analyses                                            |                    |
|-----------------------|-------------------------------------------------------------------------------------|--------------------|
|                       | Centre genes                                                                        | #Interacting genes |
| 2                     | <b>HLA-DRA: major histocompatibility complex, class II, DR alpha</b>                | 890                |
|                       | <b>HLA-DQB1: major histocompatibility complex, class II, DQ beta 1</b>              | 101                |
|                       | <b>BTNL2: butyrophilin-like 2 (MHC class II associated)</b>                         | 65                 |
|                       | <b>HLA-DQA1: major histocompatibility complex, class II, DQ alpha 1</b>             | 56                 |
|                       | <b>C6orf10: chromosome 6 open reading frame 10</b>                                  | 33                 |
|                       | <b>HLA-DQA2: major histocompatibility complex, class II, DQ alpha 2</b>             | 29                 |
|                       | <b>HLA-DRB1: major histocompatibility complex, class II, DR beta 1</b>              | 10                 |
|                       | <b>HLA-DRB9: major histocompatibility complex, class II, DR beta 9 (pseudogene)</b> | 6                  |
|                       | <b>OR4X1: olfactory receptor, family 4, subfamily X, member 1</b>                   | 6                  |
|                       | <b>FSTL5: follistatin-like 5</b>                                                    | 5                  |
| 3                     | HLA-DRA: major histocompatibility complex, class II, DR alpha                       | 866                |
|                       | HLA-DQB1: major histocompatibility complex, class II, DQ beta 1                     | 780                |
|                       | HLA-DQA2: major histocompatibility complex, class II, DQ alpha 2                    | 227                |
|                       | HLA-DQA1: major histocompatibility complex, class II, DQ alpha 1                    | 134                |
|                       | <b>PTPRJ: protein tyrosine phosphatase, receptor type, J</b>                        | 14                 |
|                       | <b>FAM84B: family with sequence similarity 84, member B</b>                         | 13                 |
|                       | <b>HSD17B8: hydroxysteroid (17-beta) dehydrogenase 8</b>                            | 11                 |
|                       | C6orf10: chromosome 6 open reading frame 10                                         | 10                 |
|                       | <b>SNX16: sorting nexin 16</b>                                                      | 10                 |
|                       | <b>SNX13: sorting nexin 13</b>                                                      | 9                  |
| 4                     | HLA-DRA: major histocompatibility complex, class II, DR alpha                       | 999                |
|                       | HLA-DQA2: major histocompatibility complex, class II, DQ alpha 2                    | 998                |
|                       | <b>CCAR2: cell cycle and apoptosis regulator 2</b>                                  | 100                |
|                       | <b>MMD: monocyte to macrophage differentiation-associated</b>                       | 100                |
|                       | <b>KDM4C: lysine (K)-specific demethylase 4C</b>                                    | 72                 |
|                       | <b>CDK19: cyclin-dependent kinase 19</b>                                            | 42                 |
|                       | <b>CTIF: CBP80/20-dependent translation initiation factor</b>                       | 41                 |
|                       | <b>CAMTA1: calmodulin binding transcription activator 1</b>                         | 37                 |
|                       | <b>CPPED1: calcineurin-like phosphoesterase domain containing 1</b>                 | 34                 |
|                       | <b>PPhLN1: periphilin 1</b>                                                         | 32                 |

Figure S3: **Overlap of results from DCHE on ones from BOOST.** The yellow bar is the overlap rate, i.e. what percentage of the top rated modules yielded by BOOST has been detected by DCHE. (A) The overlap percentage on 4 simulated models embedded epistatic interaction demonstrating both main effect and interaction effect. (B) The overlap percentage on 50 models embedded epistatic interaction demonstrating weak main effect, but strong interaction effect.

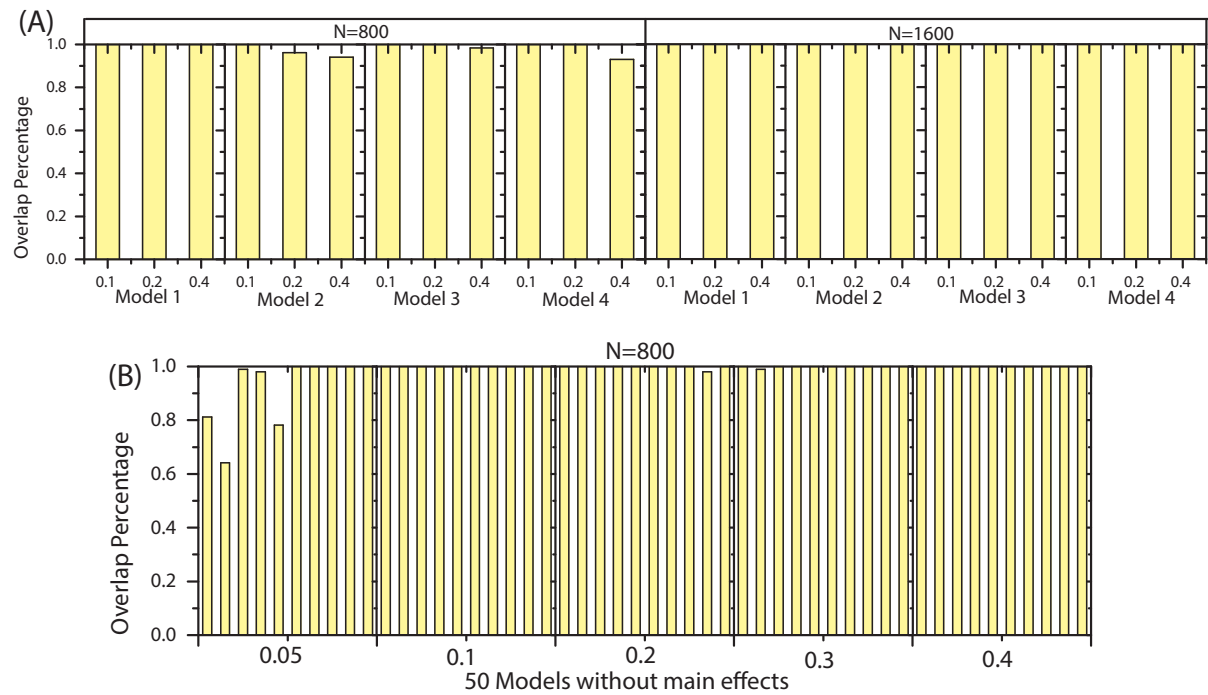

Supplement: 1471-2105-15-102-S1.pdf [file 1471-2105-15-102-S1.pdf]
